# Supplementary material
Source: HighWire-hosted journal article supplement (https://erj.ersjournals.com/content/51/2/1701374)
Supplement: inline-supplementary-material-1 [file inline-supplementary-material-1.pdf]

**Does physical fitness enhance lung function in children and young adults?**

**Robert J Hancox, Finn Rasmussen.**

**Online Data Supplement**

**Table S1a. Changes in  $\dot{V}O_{2\max}$  and spirometry between assessments in the Odense study.**

|        |                             | Measure                    | Mean change (SD) | 95% CI       |
|--------|-----------------------------|----------------------------|------------------|--------------|
| Female | <b>Age 9-15</b><br>(n=366)  | $\dot{V}O_{2\max}$ (L/min) | 0.98 (0.27)      | 0.95, 1.01   |
|        |                             | FEV <sub>1</sub> (L)       | 1.70 (0.30)      | 1.67, 1.73   |
|        |                             | FVC (L)                    | 1.82 (0.34)      | 1.79, 1.85   |
|        |                             | FEV <sub>1</sub> /FVC (%)  | 2.6 (4.7)        | 2.1, 3.0     |
|        |                             |                            |                  |              |
|        | <b>Age 15-21</b><br>(n=266) | $\dot{V}O_{2\max}$ (L/min) | -0.06 (0.33)     | -0.10, -0.02 |
|        |                             | FEV <sub>1</sub> (L)       | -0.03 (0.24)     | -0.06, 0.00  |
|        |                             | FVC (L)                    | 0.30 (0.30)      | 0.26, 0.33   |
|        |                             | FEV <sub>1</sub> /FVC (%)  | -7.3 (3.8)       | -7.7, -6.8   |
|        |                             |                            |                  |              |
|        | <b>Age 21-29</b><br>(n=276) | $\dot{V}O_{2\max}$ (L/min) | -0.10 (0.39)     | -0.15, -0.06 |
|        |                             | FEV <sub>1</sub> (L)       | -0.03 (0.23)     | -0.06, 0.00  |
|        |                             | FVC (L)                    | 0.18 (0.30)      | 0.14, 0.22   |
|        |                             | FEV <sub>1</sub> /FVC (%)  | -4.2 (4.2)       | -4.7, -3.7   |
|        |                             |                            |                  |              |
| Male   | <b>Age 9-15</b><br>(n=420)  | $\dot{V}O_{2\max}$ (L/min) | 1.57 (0.44)      | 1.53, 1.61   |
|        |                             | FEV <sub>1</sub> (L)       | 2.23 (0.50)      | 2.18, 2.27   |
|        |                             | FVC (L)                    | 2.54 (0.58)      | 2.48, 2.59   |
|        |                             | FEV <sub>1</sub> /FVC (%)  | 0.5 (4.7)        | 0.1, 1.0     |
|        |                             |                            |                  |              |
|        | <b>Age 15-21</b><br>(n=301) | $\dot{V}O_{2\max}$ (L/min) | 0.39 (0.55)      | 0.33, 0.45   |
|        |                             | FEV <sub>1</sub> (L)       | 0.55 (0.49)      | 0.50, 0.61   |
|        |                             | FVC (L)                    | 1.10 (0.60)      | 1.03, 1.17   |
|        |                             | FEV <sub>1</sub> /FVC (%)  | -7.0 (4.0)       | -7.5, -6.5   |
|        |                             |                            |                  |              |
|        | <b>Age 21-29</b><br>(n=306) | $\dot{V}O_{2\max}$ (L/min) | -0.27 (0.49)     | -0.32, -0.21 |
|        |                             | FEV <sub>1</sub> (L)       | -0.09 (0.31)     | -0.13, -0.06 |
|        |                             | FVC (L)                    | 0.16 (0.42)      | 0.11, 0.21   |
|        |                             | FEV <sub>1</sub> /FVC (%)  | -3.7 (3.7)       | -4.1, -3.2   |
|        |                             |                            |                  |              |

Only non-pregnant participants with complete data at each age are included.

**Table S1b. Changes in  $\dot{V}O_{2\max}$  and spirometry between assessments in the Dunedin study.**

|        |                             | Measure                    | Mean change (SD) | 95% CI       |
|--------|-----------------------------|----------------------------|------------------|--------------|
| Female | <b>Age 15-26</b><br>(n=288) | $\dot{V}O_{2\max}$ (L/min) | 0.21 (0.56)      | -0.15, 0.28  |
|        |                             | FEV <sub>1</sub> (L)       | 0.08 (0.28)      | 0.05, 0.11   |
|        |                             | FVC (L)                    | 0.36 (0.32)      | 0.32, 0.40   |
|        |                             | FEV <sub>1</sub> /FVC (%)  | -6.7 (4.1)       | -7.1, -6.2   |
|        |                             |                            |                  |              |
|        | <b>Age 26-32</b><br>(n=301) | $\dot{V}O_{2\max}$ (L/min) | -0.85 (0.54)     | -0.91, -0.79 |
|        |                             | FEV <sub>1</sub> (L)       | -0.05 (0.21)     | -0.08, -0.03 |
|        |                             | FVC (L)                    | 0.15 (0.25)      | 0.12, 0.18   |
|        |                             | FEV <sub>1</sub> /FVC (%)  | -3.7 (3.4)       | -4.1, -3.3   |
|        |                             |                            |                  |              |
|        | <b>Age 32-38</b><br>(n=369) | $\dot{V}O_{2\max}$ (L/min) | -0.13 (0.18)     | -0.15, -0.11 |
|        |                             | FEV <sub>1</sub> (L)       | -0.22 (0.23)     | -0.24, -0.19 |
|        |                             | FVC (L)                    | -0.14 (0.25)     | -0.17, -0.11 |
|        |                             | FEV <sub>1</sub> /FVC (%)  | -2.6 (3.7)       | -3.0, -2.2   |
|        |                             |                            |                  |              |
| Male   | <b>Age 15-26</b><br>(n=371) | $\dot{V}O_{2\max}$ (L/min) | 0.98 (0.80)      | 0.91, 1.07   |
|        |                             | FEV <sub>1</sub> (L)       | 0.96 (0.67)      | 0.90, 1.02   |
|        |                             | FVC (L)                    | 1.48 (0.74)      | 1.41, 1.56   |
|        |                             | FEV <sub>1</sub> /FVC (%)  | -5.8 (4.9)       | -6.3, -5.3   |
|        |                             |                            |                  |              |
|        | <b>Age 26-32</b><br>(n=403) | $\dot{V}O_{2\max}$ (L/min) | -0.51 (0.65)     | -0.58, -0.45 |
|        |                             | FEV <sub>1</sub> (L)       | -0.22 (0.33)     | -0.25, -0.18 |
|        |                             | FVC (L)                    | 0.01 (0.36)      | -0.02, 0.05  |
|        |                             | FEV <sub>1</sub> /FVC (%)  | -3.5 (3.9)       | -3.9, -3.1   |
|        |                             |                            |                  |              |
|        | <b>Age 32-38</b><br>(n=436) | $\dot{V}O_{2\max}$ (L/min) | -0.29 (0.28)     | -0.32, -0.26 |
|        |                             | FEV <sub>1</sub> (L)       | -0.28 (0.31)     | -0.31, -0.25 |
|        |                             | FVC (L)                    | -0.24 (0.35)     | -0.27, -0.21 |
|        |                             | FEV <sub>1</sub> /FVC (%)  | -1.7 (3.5)       | -2.1, -1.4   |
|        |                             |                            |                  |              |

Only non-pregnant participants not taking beta-blockers with complete data at each age are included.

**Table S2a. Cross-sectional analyses by sex. Odense Study:**

|               |                                | Female     |                         |                  |  | Male       |                       |                  |               |
|---------------|--------------------------------|------------|-------------------------|------------------|--|------------|-----------------------|------------------|---------------|
|               | <b>Dependent</b>               | <b>n</b>   | <b>Coeff (95% CI)</b>   | <b>p</b>         |  | <b>n</b>   | <b>Coeff (95% CI)</b> | <b>p</b>         | <b>p(int)</b> |
| <b>Age 9</b>  | FEV <sub>1</sub> (% predicted) | <b>647</b> | <b>2.8 (1.8, 3.8)</b>   | <b>&lt;0.001</b> |  | <b>646</b> | <b>2.9 (1.9, 3.8)</b> | <b>&lt;0.001</b> | 0.058         |
|               | FVC (% predicted)              | <b>647</b> | <b>2.4 (1.8, 3.1)</b>   | <b>&lt;0.001</b> |  | <b>646</b> | <b>2.5 (1.5, 3.5)</b> | <b>&lt;0.001</b> | 0.257         |
|               | FEV <sub>1</sub> /FVC (%)      | 647        | 0.3 (-0.1, 0.8)         | 0.170            |  | 646        | 0.3 (-0.2, 0.7)       | 0.246            | <b>0.038</b>  |
|               |                                |            |                         |                  |  |            |                       |                  |               |
| <b>Age 15</b> | FEV <sub>1</sub> (% predicted) | <b>346</b> | <b>2.9 (1.1, 4.7)</b>   | <b>0.001</b>     |  | <b>406</b> | <b>3.5 (1.8, 5.1)</b> | <b>&lt;0.001</b> | 0.222         |
|               | FVC (% predicted)              | <b>346</b> | <b>3.8 (2.2, 5.5)</b>   | <b>&lt;0.001</b> |  | <b>406</b> | <b>3.7 (2.2, 5.2)</b> | <b>&lt;0.001</b> | 0.386         |
|               | FEV <sub>1</sub> /FVC (%)      | <b>346</b> | <b>-0.8 (-2.0, 0.0)</b> | <b>0.050</b>     |  | 406        | -0.4 (-1.3, 0.5)      | 0.428            | 0.503         |
|               |                                |            |                         |                  |  |            |                       |                  |               |
| <b>Age 21</b> | FEV <sub>1</sub> (% predicted) | <b>421</b> | <b>3.6 (2.4, 4.7)</b>   | <b>&lt;0.001</b> |  | <b>450</b> | <b>2.6 (1.5, 3.7)</b> | <b>&lt;0.001</b> | 0.229         |
|               | FVC (% predicted)              | <b>421</b> | <b>3.4 (2.3, 4.5)</b>   | <b>&lt;0.001</b> |  | <b>450</b> | <b>3.1 (2.1, 4.1)</b> | <b>&lt;0.001</b> | 0.810         |
|               | FEV <sub>1</sub> /FVC (%)      | 421        | 0.5 (-0.6, 0.7)         | 0.883            |  | 450        | -0.4 (-1.1, 0.3)      | 0.242            | 0.207         |
|               |                                |            |                         |                  |  |            |                       |                  |               |
| <b>Age 29</b> | FEV <sub>1</sub> (% predicted) | <b>371</b> | <b>2.2 (1.1, 3.4)</b>   | <b>&lt;0.001</b> |  | <b>412</b> | <b>3.1 (1.8, 4.3)</b> | <b>&lt;0.001</b> | 0.434         |
|               | FVC (% predicted)              | <b>371</b> | <b>1.9 (0.8, 3.0)</b>   | <b>0.001</b>     |  | <b>412</b> | <b>2.3 (1.1, 3.4)</b> | <b>&lt;0.001</b> | 0.626         |
|               | FEV <sub>1</sub> /FVC (%)      | 371        | 0.1 (-0.6, 0.8)         | 0.843            |  | <b>412</b> | <b>0.7 (0.1, 1.4)</b> | <b>0.034</b>     | 0.485         |

The independent (predictor) variable is maximal oxygen uptake ( $\dot{V}O_{2\max}$  (L/min)) converted to sex-specific standard deviation scores at each age (Z-scores). Coefficients represent the difference in lung function associated with each standard deviation of  $\dot{V}O_{2\max}$ . Analyses are adjusted for height and weight, current asthma, and current smoking (age 15 onwards). Analyses exclude pregnant women. p(int) is the p value for the sex\*lung function interaction.

**Table S2b. Cross-sectional analyses by sex. Dunedin Study:**

|               |                                | Female     |                       |              |  | Male       |                       |                  |                  |
|---------------|--------------------------------|------------|-----------------------|--------------|--|------------|-----------------------|------------------|------------------|
|               | <b>Dependent</b>               | <b>n</b>   | <b>Coeff (95% CI)</b> | <b>p</b>     |  | <b>n</b>   | <b>Coeff (95% CI)</b> | <b>p</b>         | <b>p(int)</b>    |
| <b>Age 15</b> | FEV <sub>1</sub> (% predicted) | <b>402</b> | <b>1.7 (0.0, 3.4)</b> | <b>0.047</b> |  | <b>431</b> | <b>4.9 (2.9, 6.8)</b> | <b>&lt;0.001</b> | <b>&lt;0.001</b> |
|               | FVC (% predicted)              | <b>402</b> | <b>2.6 (1.0, 4.3)</b> | <b>0.002</b> |  | <b>431</b> | <b>3.8 (2.1, 5.4)</b> | <b>&lt;0.001</b> | <b>0.022</b>     |
|               | FEV <sub>1</sub> /FVC (%)      | 402        | -0.8 (-1.7, 0.2)      | 0.102        |  | 431        | 0.8 (-0.3, 1.9)       | 0.151            | <b>0.001</b>     |
|               |                                |            |                       |              |  |            |                       |                  |                  |
| <b>Age 26</b> | FEV <sub>1</sub> (% predicted) | <b>339</b> | <b>1.8 (0.5, 3.2)</b> | <b>0.009</b> |  | <b>429</b> | <b>2.6 (1.3, 3.9)</b> | <b>&lt;0.001</b> | 0.476            |
|               | FVC (% predicted)              | <b>339</b> | <b>2.3 (1.0, 3.6)</b> | <b>0.001</b> |  | <b>429</b> | <b>3.2 (1.9, 4.4)</b> | <b>&lt;0.001</b> | 0.482            |
|               | FEV <sub>1</sub> /FVC (%)      | 339        | -0.3 (-1.0, 0.4)      | 0.377        |  | 429        | -0.3 (-1.0, 0.4)      | 0.416            | 0.561            |
|               |                                |            |                       |              |  |            |                       |                  |                  |
| <b>Age 32</b> | FEV <sub>1</sub> (% predicted) | 401        | 1.2 (-0.0, 2.3)       | 0.052        |  | <b>462</b> | <b>2.4 (1.3, 3.6)</b> | <b>&lt;0.001</b> | 0.172            |
|               | FVC (% predicted)              | 401        | 0.7 (-0.5, 1.9)       | 0.253        |  | <b>462</b> | <b>2.6 (1.5, 3.6)</b> | <b>&lt;0.001</b> | 0.055            |
|               | FEV <sub>1</sub> /FVC (%)      | 401        | 0.4 (-0.2, 1.0)       | 0.161        |  | 462        | 0.0 (-0.6, 0.6)       | 0.977            | 0.482            |
|               |                                |            |                       |              |  |            |                       |                  |                  |
| <b>Age 38</b> | FEV <sub>1</sub> (% predicted) | <b>430</b> | <b>1.9 (0.7, 3.0)</b> | <b>0.002</b> |  | <b>460</b> | <b>1.6 (0.4, 2.8)</b> | <b>0.008</b>     | 0.678            |
|               | FVC (% predicted)              | <b>430</b> | <b>1.9 (0.8, 3.0)</b> | <b>0.001</b> |  | <b>460</b> | <b>1.4 (0.3, 2.5)</b> | <b>0.016</b>     | 0.492            |
|               | FEV <sub>1</sub> /FVC (%)      | 430        | 0.1 (-0.5, 0.7)       | 0.773        |  | 460        | 0.1 (-0.5, 0.8)       | 0.641            | 0.900            |

The independent (predictor) variable is maximal oxygen uptake ( $\dot{V}O_{2\max}$  (L/min)) converted to sex-specific standard deviation scores at each age (Z-scores). Coefficients represent the difference in lung function associated with each standard deviation of  $\dot{V}O_{2\max}$ . Analyses are adjusted for height and weight, current asthma, and current smoking (age 15 onwards). Analyses exclude pregnant women. p(int) is the p value for the sex\*lung function interaction.

**Table S3a. Longitudinal analyses by sex. Odense Study:**

|          |                                | Female |                  |       |  | Male |                  |        |        |
|----------|--------------------------------|--------|------------------|-------|--|------|------------------|--------|--------|
| Age      | Dependent                      | n      | Coeff (95% CI)   | p     |  | n    | Coeff (95% CI)   | p      | p(int) |
| 9 to 15  | FEV <sub>1</sub> (% predicted) | 334    | 0.7 (-0.2, 1.6)  | 0.128 |  | 384  | 2.9 (1.9, 4.0)   | <0.001 | <0.001 |
|          | FVC (% predicted)              | 334    | 1.0 (0.2, 1.9)   | 0.021 |  | 384  | 2.9 (1.9, 3.8)   | <0.001 | <0.001 |
|          | FEV <sub>1</sub> /FVC (%)      | 334    | -0.3 (-0.8, 0.3) | 0.317 |  | 384  | -0.1 (-0.6, 0.5) | 0.819  | 0.892  |
| 15 to 21 | FEV <sub>1</sub> (% predicted) | 249    | 1.1 (0.4, 1.9)   | 0.004 |  | 290  | 1.1 (0.3, 2.0)   | 0.009  | 0.987  |
|          | FVC (% predicted)              | 249    | 0.9 (0.1, 1.7)   | 0.020 |  | 290  | 1.5 (0.7, 2.4)   | 0.001  | 0.330  |
|          | FEV <sub>1</sub> /FVC (%)      | 249    | 0.1 (-0.3, 0.6)  | 0.571 |  | 290  | -0.2 (-0.8, 0.3) | 0.389  | 0.357  |
| 21 to 29 | FEV <sub>1</sub> (% predicted) | 265    | 0.5 (-0.3, 1.2)  | 0.207 |  | 297  | 0.6 (-0.1, 1.3)  | 0.098  | 0.690  |
|          | FVC (% predicted)              | 265    | 0.8 (0.0, 1.6)   | 0.065 |  | 297  | 0.5 (-0.2, 1.3)  | 0.146  | 0.749  |
|          | FEV <sub>1</sub> /FVC (%)      | 265    | -0.2 (-0.7, 0.2) | 0.320 |  | 297  | 0.1 (-0.3, 0.6)  | 0.539  | 0.303  |

The independent (predictor) variable is the change in maximal oxygen uptake ( $\dot{V}O_{2\max}$ ) between ages converted to sex-specific standard deviation scores. Coefficients represent the difference in lung function associated with each standard deviation change in  $\dot{V}O_{2\max}$ . Analyses are adjusted for lung function at the younger age, weight, height, asthma, and smoking at each age. Pregnant women are excluded. p(int) is the p value for the sex\*lung function interaction

**Table S3b. Longitudinal analyses by sex. Dunedin Study:**

|          |                                | Female |                  |       |  | Male       |                       |                  |        |
|----------|--------------------------------|--------|------------------|-------|--|------------|-----------------------|------------------|--------|
| Age      | Dependent                      | n      | Coeff (95% CI)   | p     |  | n          | Coeff (95% CI)        | p                | p(int) |
| 15 to 26 | FEV <sub>1</sub> (% predicted) | 284    | 0.4 (-0.6, 1.3)  | 0.442 |  | <b>366</b> | <b>1.4 (0.3, 2.5)</b> | <b>0.016</b>     | 0.191  |
|          | FVC (% predicted)              | 284    | 0.8 (-0.1, 1.7)  | 0.090 |  | <b>366</b> | <b>2.0 (1.0, 3.0)</b> | <b>&lt;0.001</b> | 0.122  |
|          | FEV <sub>1</sub> /FVC (%)      | 284    | -0.4 (-0.8, 0.1) | 0.138 |  | 366        | -0.3 (-0.8, 0.3)      | 0.328            | 0.609  |
|          |                                |        |                  |       |  |            |                       |                  |        |
| 26 to 32 | FEV <sub>1</sub> (% predicted) | 298    | -0.7 (-1.4, 0.1) | 0.096 |  | 401        | -0.3 (-1.1, 0.4)      | 0.343            | 0.600  |
|          | FVC (% predicted)              | 298    | -0.6 (-1.4, 0.2) | 0.115 |  | 401        | -0.2 (-0.9, 0.5)      | 0.548            | 0.656  |
|          | FEV <sub>1</sub> /FVC (%)      | 298    | -0.1 (-0.4, 0.3) | 0.738 |  | 401        | -0.1 (-0.5, 0.3)      | 0.606            | 0.626  |
|          |                                |        |                  |       |  |            |                       |                  |        |
| 32 to 38 | FEV <sub>1</sub> (% predicted) | 369    | 0.2 (-0.5, 0.9)  | 0.569 |  | 436        | -0.3 (-0.9, 0.4)      | 0.406            | 0.412  |
|          | FVC (% predicted)              | 369    | 0.3 (-0.3, 1.0)  | 0.307 |  | 436        | -0.2 (-0.8, 0.3)      | 0.435            | 0.306  |
|          | FEV <sub>1</sub> /FVC (%)      | 369    | -0.1 (-0.5, 0.3) | 0.596 |  | 436        | -0.1 (-0.4, 0.2)      | 0.656            | 0.973  |

The independent (predictor) variable is the change in maximal oxygen uptake ( $\dot{V}O_{2\max}$ ) between ages converted to sex-specific standard deviation scores. Coefficients represent the difference in lung function associated with each standard deviation change in  $\dot{V}O_{2\max}$ . Analyses are adjusted for lung function at the younger age, weight, height, asthma, and smoking at each age. Pregnant women and participants taking beta-blockers at either assessment are excluded. p(int) is the p value for the sex\*lung function interaction

**Table S4a. Cross-sectional analyses at age 15 in the Odense study adjusted for pubertal status.**

|                      | <b>Dependent</b>               | <b>Coeff. (95% CI)</b>   | <b>p</b>         |
|----------------------|--------------------------------|--------------------------|------------------|
| <b>Girls (n=340)</b> | FEV <sub>1</sub> (% predicted) | <b>2.8 (0.9, 4.6)</b>    | <b>0.003</b>     |
|                      | FVC (% predicted)              | <b>3.7 (2.1, 5.4)</b>    | <b>&lt;0.001</b> |
|                      | FEV <sub>1</sub> /FVC (%)      | <b>-1.1 (-2.1, -0.1)</b> | <b>0.039</b>     |
|                      |                                |                          |                  |
| <b>Boys (n=398)</b>  | FEV <sub>1</sub> (% predicted) | <b>2.9 (1.2, 4.6)</b>    | <b>0.001</b>     |
|                      | FVC (% predicted)              | <b>3.4 (1.9, 4.9)</b>    | <b>&lt;0.001</b> |
|                      | FEV <sub>1</sub> /FVC (%)      | -0.7 (-1.6, 0.3)         | 0.178            |
|                      |                                |                          |                  |
| <b>All (n=738)</b>   | FEV <sub>1</sub> (% predicted) | <b>2.9 (1.6, 4.0)</b>    | <b>&lt;0.001</b> |
|                      | FVC (% predicted)              | <b>3.5 (2.4, 4.6)</b>    | <b>&lt;0.001</b> |
|                      | FEV <sub>1</sub> /FVC (%)      | <b>-0.8 (-1.5, 0.1)</b>  | <b>0.019</b>     |

The independent (predictor) variable is maximal oxygen uptake ( $\dot{V}O_{2\max}$  (L/min)). Coefficients represent the difference in lung function associated with each unit of  $\dot{V}O_{2\max}$ . Analyses are adjusted for height, weight, current asthma, current smoking (age 15 onwards) and Tanner pubertal status. Beta values are standardised regression coefficients representing the standard deviation difference in lung function associated with each standard deviation difference in  $\dot{V}O_{2\max}$ .

**Table S4b. Tanner pubertal stages among boys and girls at age 15 in the Odense study**

| <b>Tanner stage</b> | <b>Girls n(%)</b> | <b>Boys n(%)</b> |
|---------------------|-------------------|------------------|
| 1                   | 0                 | 2 (0.5%)         |
| 2                   | 1 (0.3%)          | 9 (2.3%)         |
| 3                   | 14 (4.1%)         | 31 (7.8%)        |
| 4                   | 233 (68.5%)       | 217 (54.5%)      |
| 5                   | 92 (27.1%)        | 139 (35%)        |



**Table S5a. Cross-sectional analyses at each age excluding participants with asthma: Does lung function predict fitness?**

**Odense Study:**

|                   | <b>Dependent</b>               | <b>Coeff (95% CI)</b>    | <b>p</b>         |
|-------------------|--------------------------------|--------------------------|------------------|
| Age 9<br>(n=1244) | FEV <sub>1</sub> (% predicted) | <b>3.1 (2.2, 4.0)</b>    | <b>&lt;0.001</b> |
|                   | FVC (% predicted)              | <b>2.5 (1.8, 3.13)</b>   | <b>&lt;0.001</b> |
|                   | FEV <sub>1</sub> /FVC (%)      | 0.3 (-0.1, 0.6)          | 0.117            |
|                   |                                |                          |                  |
| Age 15<br>(n=676) | FEV <sub>1</sub> (% predicted) | <b>3.1 (1.9, 4.4)</b>    | <b>&lt;0.001</b> |
|                   | FVC (% predicted)              | <b>3.8 (2.7, 5.0)</b>    | <b>&lt;0.001</b> |
|                   | FEV <sub>1</sub> /FVC (%)      | <b>-0.8 (-1.5, -0.1)</b> | <b>0.020</b>     |
|                   |                                |                          |                  |
| Age 21<br>(n=775) | FEV <sub>1</sub> (% predicted) | <b>3.2 (2.3, 3.9)</b>    | <b>&lt;0.001</b> |
|                   | FVC (% predicted)              | <b>3.3 (2.5, 4.1)</b>    | <b>&lt;0.001</b> |
|                   | FEV <sub>1</sub> /FVC (%)      | -0.2 (-0.7, 0.3)         | 0.400            |
|                   |                                |                          |                  |
| Age 29<br>(n=685) | FEV <sub>1</sub> (% predicted) | <b>2.7 (1.7, 3.6)</b>    | <b>&lt;0.001</b> |
|                   | FVC (% predicted)              | <b>1.9 (1.0, 2.7)</b>    | <b>&lt;0.001</b> |
|                   | FEV <sub>1</sub> /FVC (%)      | <b>0.6 (0.7, 1.1)</b>    | <b>0.025</b>     |

The independent (predictor) variable is maximal oxygen uptake ( $\dot{V}O_{2\max}$  (L/min)). Coefficients represent the difference in lung function associated with each unit of  $\dot{V}O_{2\max}$ . Analyses are adjusted for height and weight and current smoking (age 15 onwards). Participants reporting asthma and pregnant women are excluded.

**Table S5b. Cross-sectional analyses at each age excluding participants with asthma: Does lung function predict fitness?**

**Dunedin Study:**

|                   | <b>Dependent</b>               | <b>Coeff (95% CI)</b>   | <b>p</b>         |
|-------------------|--------------------------------|-------------------------|------------------|
| Age 15<br>(n=712) | FEV <sub>1</sub> (% predicted) | <b>2.6 (1.3, 3.9)</b>   | <b>&lt;0.001</b> |
|                   | FVC (% predicted)              | <b>2.7 (1.5, 3.9)</b>   | <b>&lt;0.001</b> |
|                   | FEV <sub>1</sub> /FVC (%)      | 0.2 (-0.9, 0.6)         | 0.666            |
|                   |                                |                         |                  |
| Age 26<br>(n=630) | FEV <sub>1</sub> (% predicted) | <b>2.1 (1.1, 3.1)</b>   | <b>&lt;0.001</b> |
|                   | FVC (% predicted)              | <b>2.8 (1.8, 3.7)</b>   | <b>&lt;0.001</b> |
|                   | FEV <sub>1</sub> /FVC (%)      | <b>-0.5 (-1.0, 0.0)</b> | <b>0.047</b>     |
|                   |                                |                         |                  |
| Age 32<br>(n=713) | FEV <sub>1</sub> (% predicted) | <b>1.7 (0.8, 2.5)</b>   | <b>&lt;0.001</b> |
|                   | FVC (% predicted)              | <b>1.5 (0.7, 2.3)</b>   | <b>&lt;0.001</b> |
|                   | FEV <sub>1</sub> /FVC (%)      | 0.2 (-0.3, 0.6)         | 0.428            |
|                   |                                |                         |                  |
| Age 38<br>(n=742) | FEV <sub>1</sub> (% predicted) | <b>1.7 (0.8, 2.5)</b>   | <b>&lt;0.001</b> |
|                   | FVC (% predicted)              | <b>1.6 (0.7, 2.4)</b>   | <b>&lt;0.001</b> |
|                   | FEV <sub>1</sub> /FVC (%)      | 0.1 (-0.3, 0.5)         | 0.686            |

The independent (predictor) variable is maximal oxygen uptake ( $\dot{V}O_{2\max}$  (L/min)). Coefficients represent the difference in lung function associated with each unit of  $\dot{V}O_{2\max}$ . Analyses are adjusted for height, weight, pack-years smoking. Pregnant women, participants reporting asthma, and those taking beta-blockers are excluded.

**Table S6a. Longitudinal analyses excluding participants with asthma. Do changes in fitness predict lung function?**

**Odense Study**

|                      | <b>Dependent</b>               | <b>Coeff (95% CI)</b> | <b>p</b>         |
|----------------------|--------------------------------|-----------------------|------------------|
| Age 9-15<br>(n=676)  | FEV <sub>1</sub> (% predicted) | <b>1.9 (1.2, 2.6)</b> | <b>&lt;0.001</b> |
|                      | FVC (% predicted)              | <b>2.1 (1.4, 2.7)</b> | <b>&lt;0.001</b> |
|                      | FEV <sub>1</sub> /FVC (%)      | -0.2 (-0.5, 0.2)      | 0.343            |
|                      |                                |                       |                  |
| Age 15-21<br>(n=476) | FEV <sub>1</sub> (% predicted) | <b>1.1 (0.5, 1.7)</b> | <b>&lt;0.001</b> |
|                      | FVC (% predicted)              | <b>1.3 (0.7, 1.9)</b> | <b>&lt;0.001</b> |
|                      | FEV <sub>1</sub> /FVC (%)      | -0.1 (-0.5, 0.2)      | 0.457            |
|                      |                                |                       |                  |
| Age 21-29<br>(n=485) | FEV <sub>1</sub> (% predicted) | <b>0.6 (0.0, 1.1)</b> | <b>0.038</b>     |
|                      | FVC (% predicted)              | <b>0.6 (0.0, 1.2)</b> | <b>0.037</b>     |
|                      | FEV <sub>1</sub> /FVC (%)      | 0.0 (-0.3, 0.3)       | 0.977            |

The independent (predictor) variable is the change in maximal oxygen uptake ( $\dot{V}O_{2\max}$  (L/min)) between ages. Coefficients represent the difference in lung function associated with the change in  $\dot{V}O_{2\max}$ . Analyses are adjusted for lung function at the younger age, weight, height, and smoking at each age. Pregnant women and participants reporting asthma at either assessment are excluded.

The independent (predictor) variable is the change in maximal oxygen uptake ( $\dot{V}O_{2\max}$ ) between ages converted to sex-specific standard deviation scores. Coefficients represent the difference in lung function associated with each standard deviation change in  $\dot{V}O_{2\max}$ . Analyses are adjusted for lung function at the younger age, weight, height, asthma, and smoking at each age. Pregnant women and participants taking beta-blockers at either assessment are excluded. p(int) is the p value for the sex\*lung function interaction

**Table S6b. Longitudinal analyses excluding participants with asthma. Do changes in fitness predict lung function?**

**Dunedin Study**

|                      | <b>Dependent</b>               | <b>Coeff (95% CI)</b> | <b>p</b>     |
|----------------------|--------------------------------|-----------------------|--------------|
| Age 15-26<br>(n=505) | FEV <sub>1</sub> (% predicted) | <b>0.9 (0.1, 1.6)</b> | <b>0.032</b> |
|                      | FVC (% predicted)              | <b>1.3 (0.5, 2.0)</b> | <b>0.001</b> |
|                      | FEV <sub>1</sub> /FVC (%)      | -0.3 (-0.6, 0.1)      | 0.185        |
|                      |                                |                       |              |
| Age 26-32<br>(n=541) | FEV <sub>1</sub> (% predicted) | -0.4 (-1.0, 0.1)      | 0.139        |
|                      | FVC (% predicted)              | -0.4 (-0.9, 0.1)      | 0.149        |
|                      | FEV <sub>1</sub> /FVC (%)      | 0.0 (-0.3, 0.2)       | 0.784        |
|                      |                                |                       |              |
| Age 32-38<br>(n=638) | FEV <sub>1</sub> (% predicted) | -0.12 (-0.5, 0.4)     | 0.785        |
|                      | FVC (% predicted)              | 0.0 (-0.4, 0.5)       | 0.837        |
|                      | FEV <sub>1</sub> /FVC (%)      | -0.1 (-0.4, 0.1)      | 0.311        |

The independent (predictor) variable is the change in maximal oxygen uptake ( $\dot{V}O_{2\max}$  (L/min)) between ages. Coefficients represent the difference in lung function associated with the change in  $\dot{V}O_{2\max}$ . Analyses are adjusted for lung function at the younger age, weight, height, and smoking at each age. Pregnant women, participants reporting asthma, and those taking beta-blockers at either assessment are excluded.
